# Supplementary material for: Effect of Polydopamine Coating of Cellulose Nanocrystals on Performance of PCL/PLA Bio-Nanocomposites
Source: MDPI journal article supplement (doi:10.3390/ma16031087), 2023-01-27
Supplement: s1 [file s1]

# Supplementary Materials

**Table S1.** Composition of PLA/PCL blends and nanocomposites in % wt.

| PLA/PCL | Code               | PLA | PLA <sub>dmf</sub> | PLA/CNC | PLA/CNCd | PCL | PCL <sub>dmf</sub> | PCL/CNC | PCL/CNCd |
|---------|--------------------|-----|--------------------|---------|----------|-----|--------------------|---------|----------|
| 80/20   | PLA <sub>dmf</sub> | 60  | 20                 |         |          | 20  |                    |         |          |
|         | PCL <sub>dmf</sub> | 80  |                    |         |          |     | 20                 |         |          |
|         | PLA/CNC            | 60  |                    | 20      |          | 20  |                    |         |          |
|         | PCL/CNC            | 80  |                    |         |          |     |                    | 20      |          |
|         | PLA/CNCd           | 60  |                    |         | 20       | 20  |                    |         |          |
|         | PCL/CNCd           | 80  |                    |         |          |     |                    |         | 20       |
| 60/40   | PLA <sub>dmf</sub> | 40  | 20                 |         |          | 40  |                    |         |          |
|         | PCL <sub>dmf</sub> | 60  |                    |         |          | 20  | 20                 |         |          |
|         | PLA/CNC            | 40  |                    | 20      |          | 40  |                    |         |          |
|         | PCL/CNC            | 60  |                    |         |          | 20  | 20                 |         |          |
|         | PLA/CNCd           | 40  |                    |         | 20       | 40  |                    |         |          |
|         | PCL/CNCd           | 60  |                    |         |          | 20  |                    |         | 20       |
| 40/60   | PLA <sub>dmf</sub> | 20  | 20                 |         |          | 60  |                    |         |          |
|         | PCL <sub>dmf</sub> | 40  |                    |         |          | 40  | 20                 |         |          |
|         | PLA/CNC            | 20  |                    | 20      |          | 60  |                    |         |          |
|         | PCL/CNC            | 40  |                    |         |          | 40  |                    | 20      |          |
|         | PLA/CNCd           | 20  |                    |         | 20       | 60  |                    |         |          |
|         | PCL/CNCd           | 40  |                    |         |          | 40  |                    |         | 20       |
| 20/80   | PLA <sub>dmf</sub> |     | 20                 |         |          | 80  |                    |         |          |
|         | PCL <sub>dmf</sub> | 20  |                    |         |          | 60  | 20                 |         |          |
|         | PLA/CNC            |     |                    | 20      |          | 80  |                    |         |          |
|         | PCL/CNC            | 20  |                    |         |          | 60  |                    | 20      |          |
|         | PLA/CNCd           |     |                    |         | 20       | 80  |                    |         |          |
|         | PCL/CNCd           | 20  |                    |         |          | 60  |                    |         | 20       |

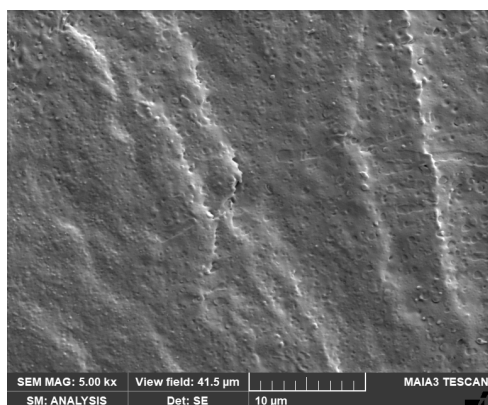

(a)

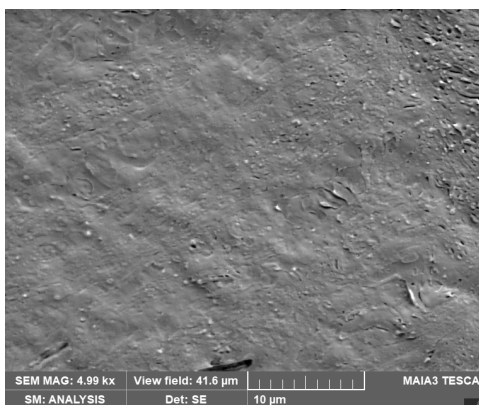

(b)

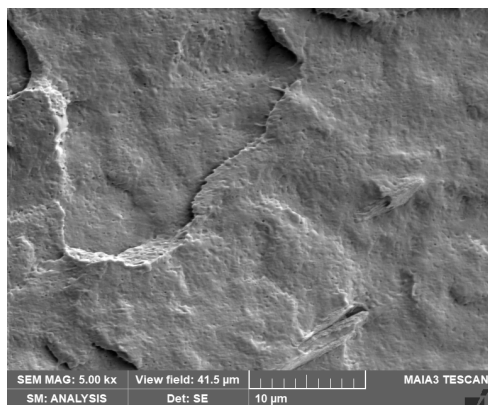

(c)

**Figure S1.** SEM images of specimens broken under liquid nitrogen (a) 20/80 PLA/CNC masterbatch (b) 40/60 PCL/CNC masterbatch, (c) 60/40 PLA/CNC masterbatch.

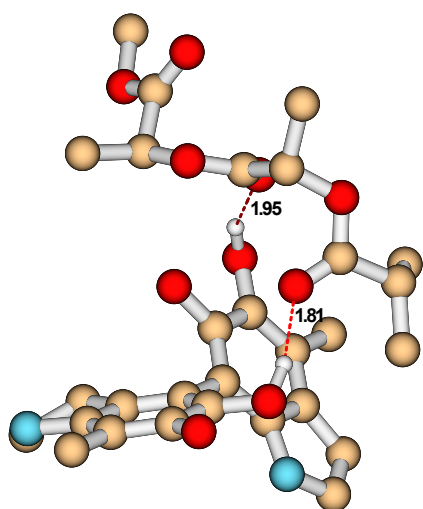

(a) Stabilization energy: 22.0 kcal/mol

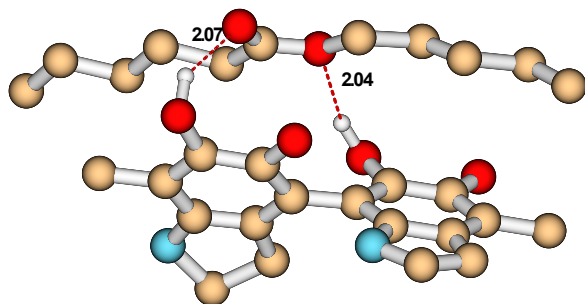

(b) Stabilization energy: 27.6 kcal/mol

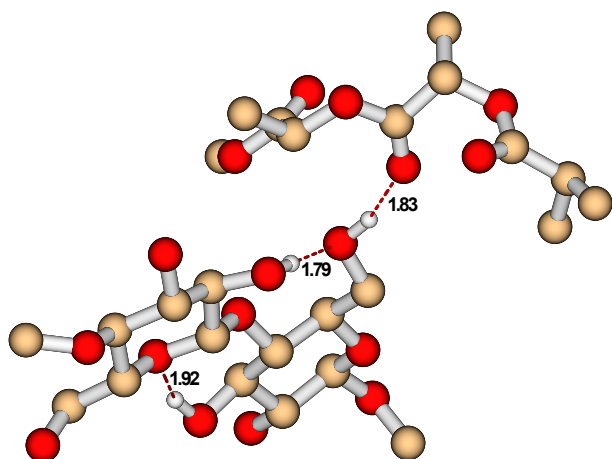

(c) Stabilization energy: 16.2 kcal/mol

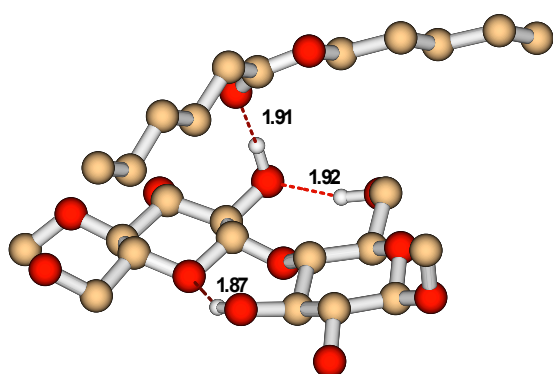

(d) Stabilization energy: 16.7 kcal/mol

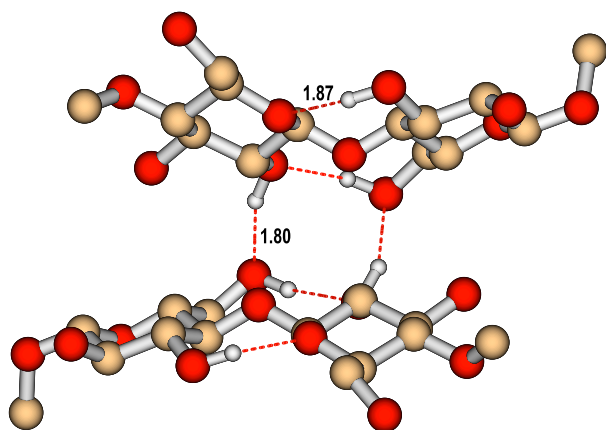

(e) Stabilization energy: 29.7 kcal/mol

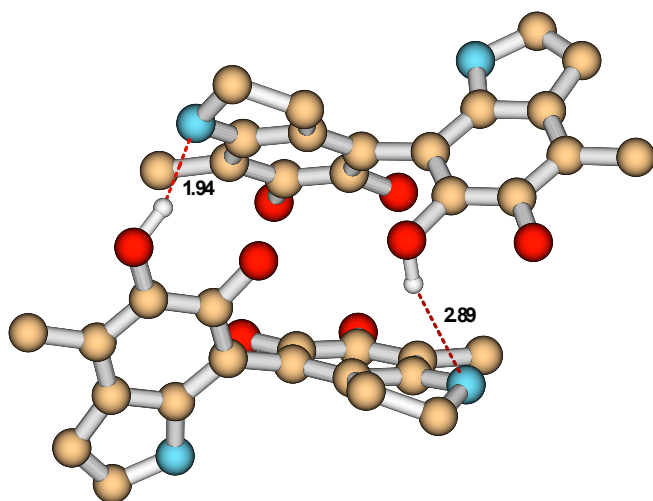

(f) Stabilization energy: 33.1 kcal/mol

**Figure S2.** (a) DFT model calculations of interactions between the structural units of PDA and PDL. Hydrogen atoms are omitted for clarity. (b) DFT model calculations of interactions between the structural units of PDA and PCL. Hydrogen atoms are omitted for clarity. (c) DFT model calculations of interactions between the structural units of CNC and PLA. Hydrogen atoms are omitted for clarity. (d) DFT model calculations of interactions between the structural units of CNC and PCL. Hydrogen atoms are omitted for clarity. (e) DFT model calculations of interactions between the structural units of CNC and CNC. Hydrogen atoms are omitted for clarity. (f) DFT model calculations of interactions between the structural units of PDA and PDA. Hydrogen atoms are omitted for clarity.

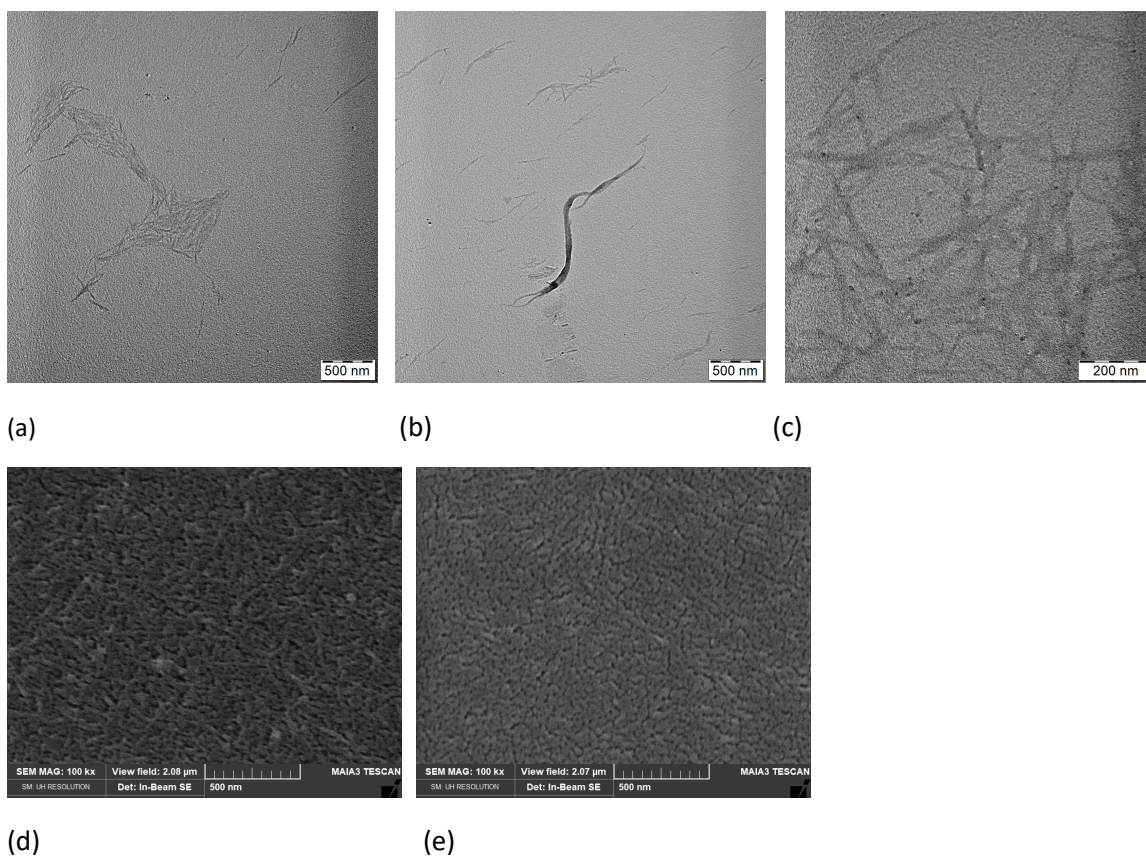

**Figure S3.** TEM images of (CNC) (a) and polydopamine-coated cellulose nanocrystals CNCd (b,c) and SEM images of (d) CNC and (e) CNCd confirming higher potential of Polydopamine-coated CNC for ordering

## Rheological characterization of polymer components

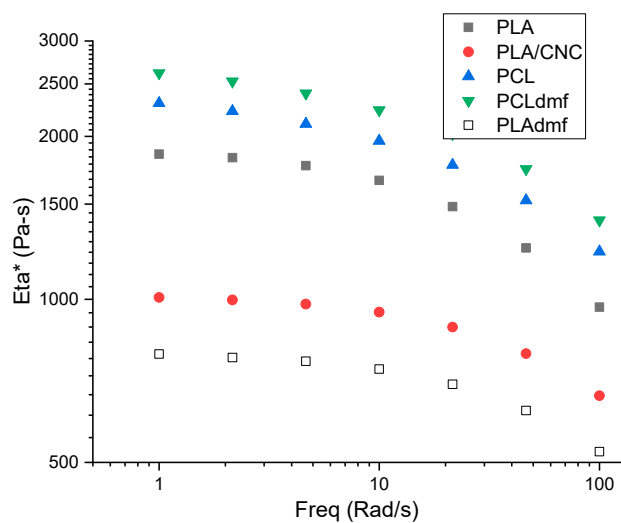

**Figure S4.** Viscosity of polymer components: DMF treatment of PLA and PCL identical to masterbatch preparation

From Figure S4 follows that viscosity of melt processed PLA and PCL are comparable, surprisingly, DMF treatment causes slight increase PCL viscosity but relatively marked decrease for PLA.

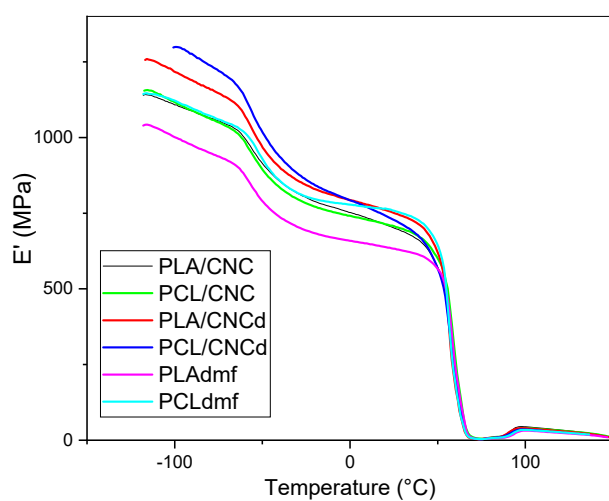

(a)

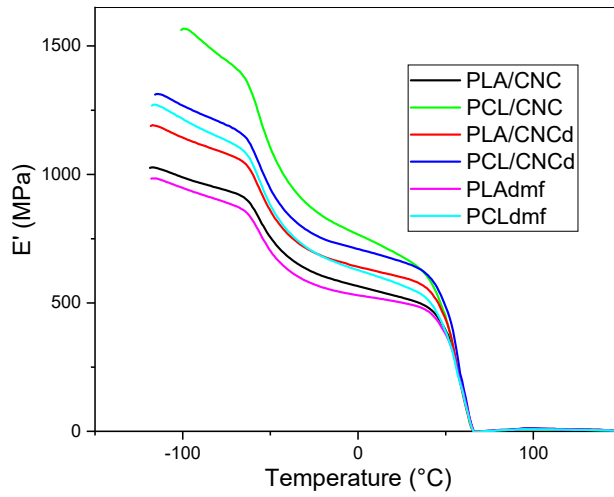

(b)

**Figure S5.** Temperature dependence of storage modulus of **a)** 60/40 PCL/PLA ratio; **b)** 40/60 ratio.

**Table S2.** Crystallinity of PCL, „total“ crystallinity of PLA (initial + cold crystallization) + initial crystallinity of PLA.

| 1st run  | 80/20   |          |          | 60/40   |          |          | 40/60   |          |          | 20/80   |          |          |
|----------|---------|----------|----------|---------|----------|----------|---------|----------|----------|---------|----------|----------|
|          | PCL [%] | PLAm [%] | PLAi [%] | PCL [%] | PLAm [%] | PLAi [%] | PCL [%] | PLAm [%] | PLAi [%] | PCL [%] | PLAi [%] | PLAm [%] |
| PLA/CNC  | 71.57   | 30.17    | 3.25     | 59.76   | 31.42    | 4.02     | 57.02   | 30.12    | 3.51     | 54.99   | 28.06    | 4.77     |
| PCL/CNC  | 70.65   | 27.73    | 3.03     | 61.14   | 29.10    | 3.86     | 57.49   | 29.18    | 4.71     | 59.68   | 29.45    | 8.51     |
| PLA/CNCd | 72.19   | 29.86    | 3.72     | 64.58   | 28.74    | 3.86     | 59.57   | 26.93    | 3.76     | 55.70   | 27.92    | 2.95     |
| PCL/CNCd | 70.52   | 27.76    | 3.15     | 58.35   | 25.81    | 2.98     | 55.95   | 27.52    | 2.62     | 53.15   | 26.67    | 4.47     |
| PLAdmf   | 60.85   | 28.28    | 4.86     | 58.36   | 27.45    | 4.39     | 57.69   | 30.12    | 6.29     | 54.60   | 32.87    | 7.02     |
| PCLdmf   | 60.90   | 25.56    | 4.13     | 55.61   | 26.84    | 3.29     | 56.60   | 27.71    | 6.16     | 53.27   | 27.42    | 8.64     |
